# Supplementary material for: DAISM-DNNXMBD: Highly accurate cell type proportion estimation with in silico data augmentation and deep neural networks
Source: PubMed Central journal article supplement — Patterns (N Y). 2022 Feb 3;3(3):100440. doi: 10.1016/j.patter.2022.100440 (PMC9058910; doi:10.1016/j.patter.2022.100440), 2022-02-03
Supplement: mmc1.pdf [file mmc1.pdf]

Patterns, Volume 3

## Supplemental information

**DAISM-DNN<sup>XMBD</sup>: Highly accurate cell  
type proportion estimation with *in silico*  
data augmentation and deep neural networks**

**Yating Lin, Haojun Li, Xu Xiao, Lei Zhang, Kejia Wang, Jingbo Zhao, Minshu Wang, Frank Zheng, Minwei Zhang, Wenxian Yang, Jiahuai Han, and Rongshan Yu**

**Supplementary figures**

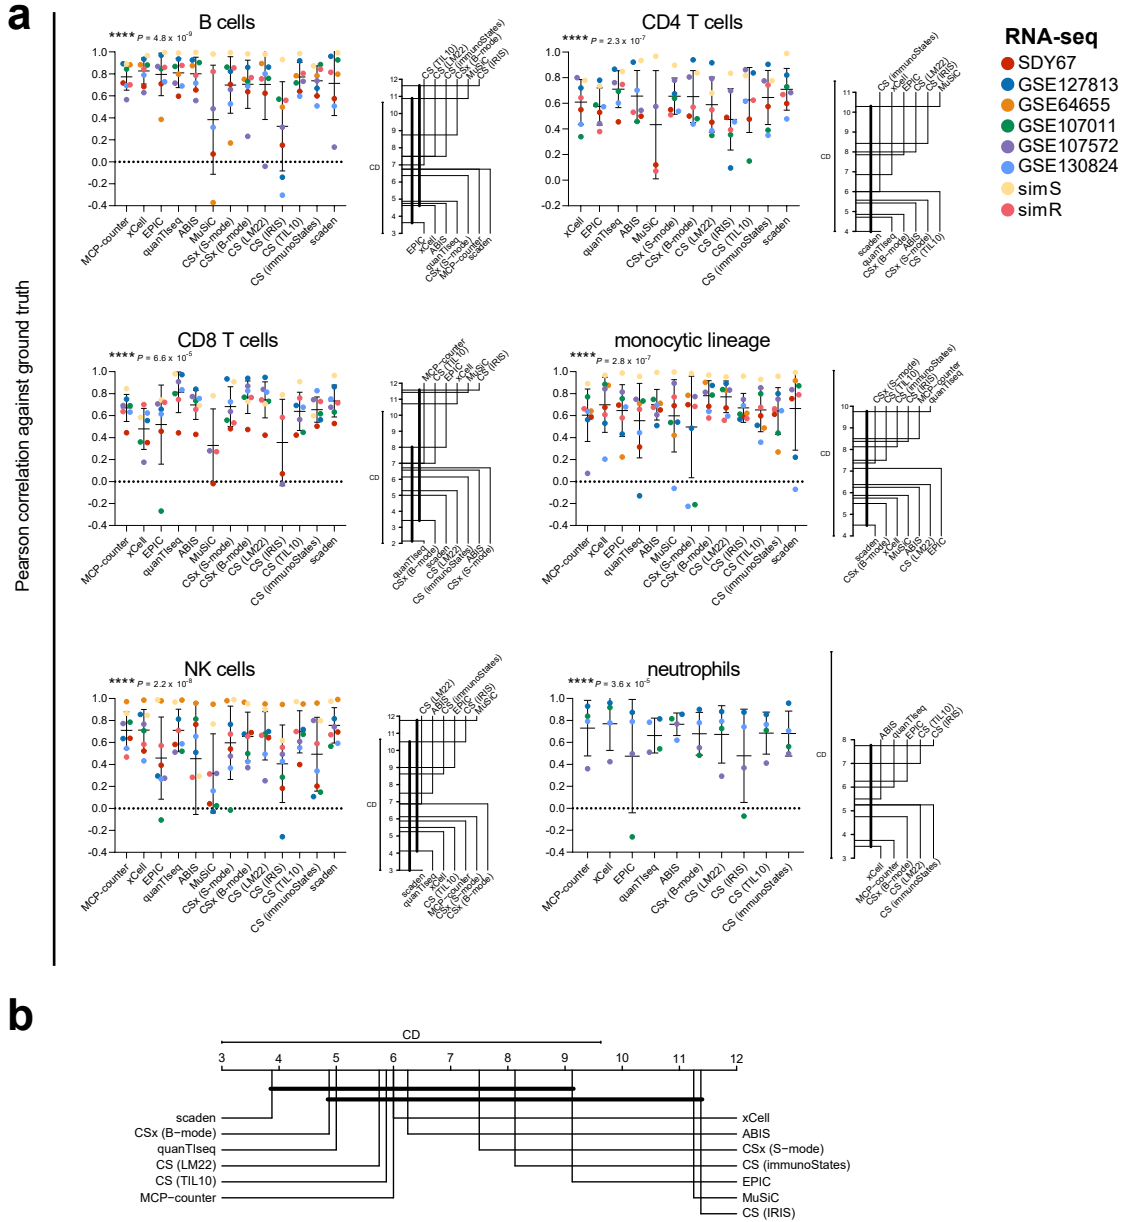

Figure S1: Evaluation of consistency in deconvolution performance across RNA-seq datasets. (a) Pearson correlations of the predicted cell type proportions of 13 deconvolution methods (including CIBERSORT using four different signature matrices) on six real-world datasets and two simulated datasets for six cell types, shown in scatter plots (left) with corresponding critical difference (CD) diagrams (right). Data are presented as means $\pm$ SD. \* $P < 0.05$ , \*\* $P < 0.01$ , \*\*\* $P < 0.001$ , Friedman's rank sum test. (b) Comparison of 13 deconvolution methods on these eight datasets with post hoc two-tailed Nemenyi test. Groups of deconvolution methods that are not significantly different ( $\alpha = 0.05$ ) are connected.

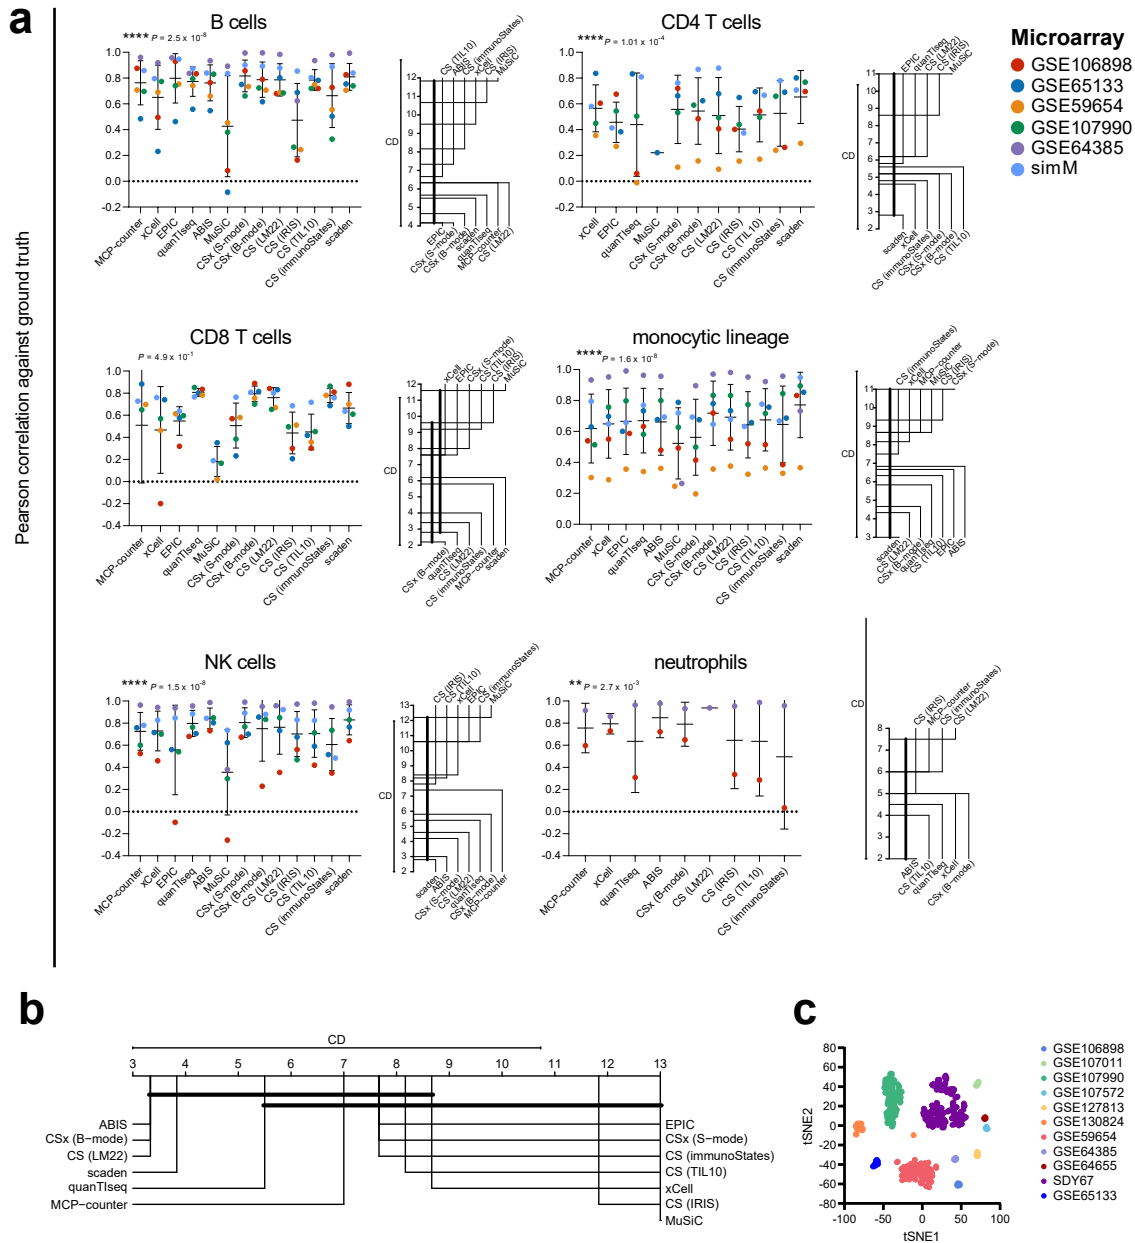

Figure S2: Evaluation of consistency in deconvolution performance across microarray datasets. (a) Pearson correlations of the predicted cell type proportions of 13 deconvolution methods (including CIBERSORT using four different signature matrices) on five real-world datasets and one simulated dataset for six cell types, shown in scatter plots (left) with corresponding critical difference (CD) diagrams (right). Data are presented as means $\pm$ SD. \* $P < 0.05$ , \*\* $P < 0.01$ , \*\*\* $P < 0.001$ , Friedman's rank sum test. (b) Comparison of 13 deconvolution methods on these six datasets with post hoc two-tailed Nemenyi test. Groups of deconvolution methods that are not significantly different ( $\alpha = 0.05$ ) are connected. (c) t-SNE projection of eleven real-world datasets. Each dot represents one single sample, coloured by datasets.



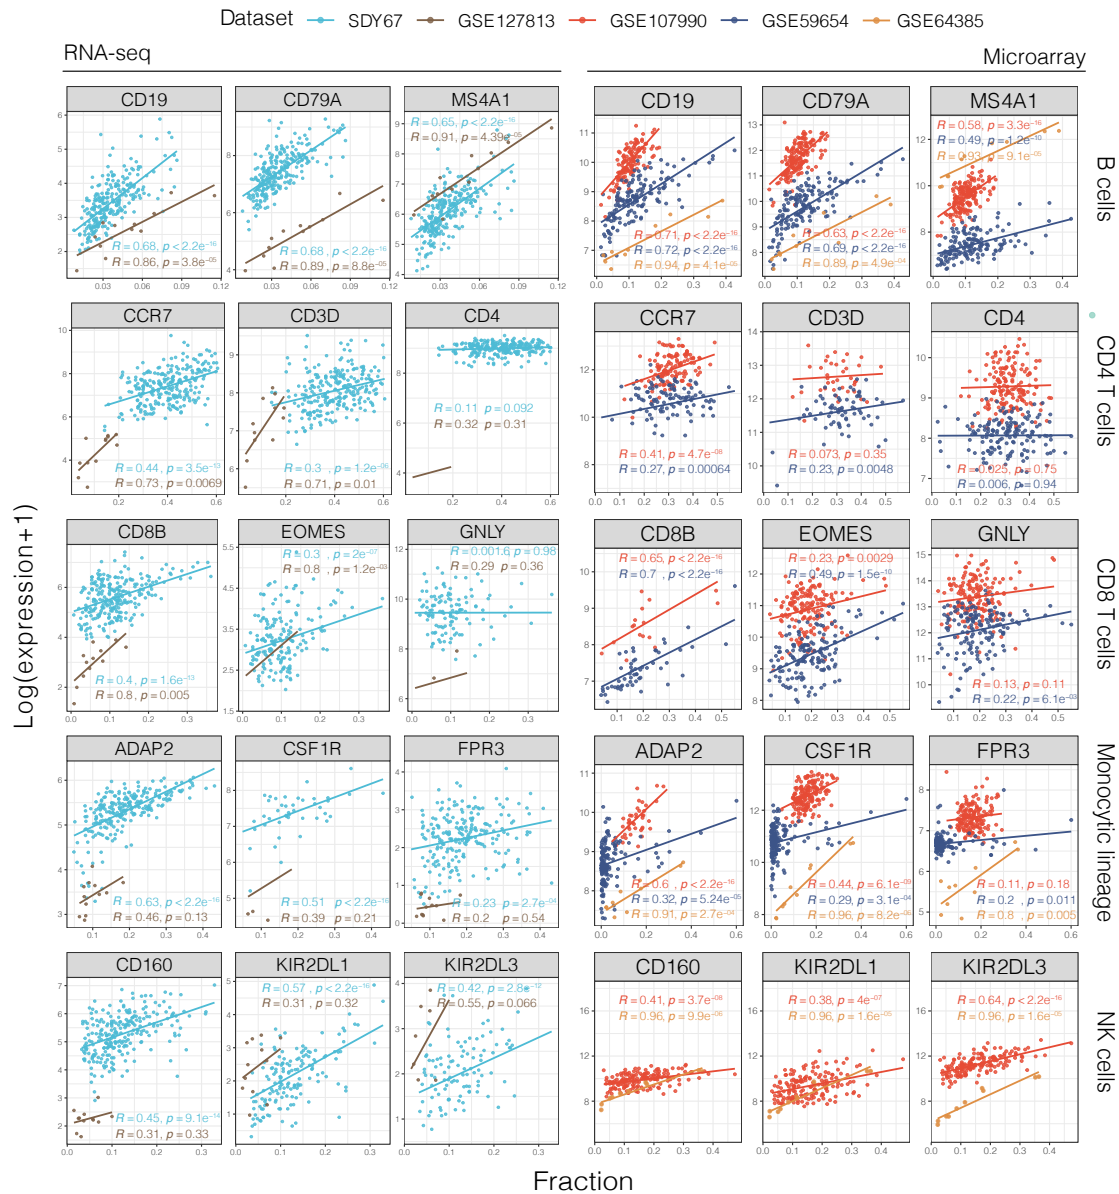

Figure S3: Relationships between the gene expression and cell type proportions on cell markers of different cell types among two RNA datasets and three microarray datasets. For each cell type, we selected three markers which were used for identifying corresponding cell type. Numbers inside the scatter plotting area signify Pearson correlation values and p-values (Student's *t*-test) when performing linear regression.

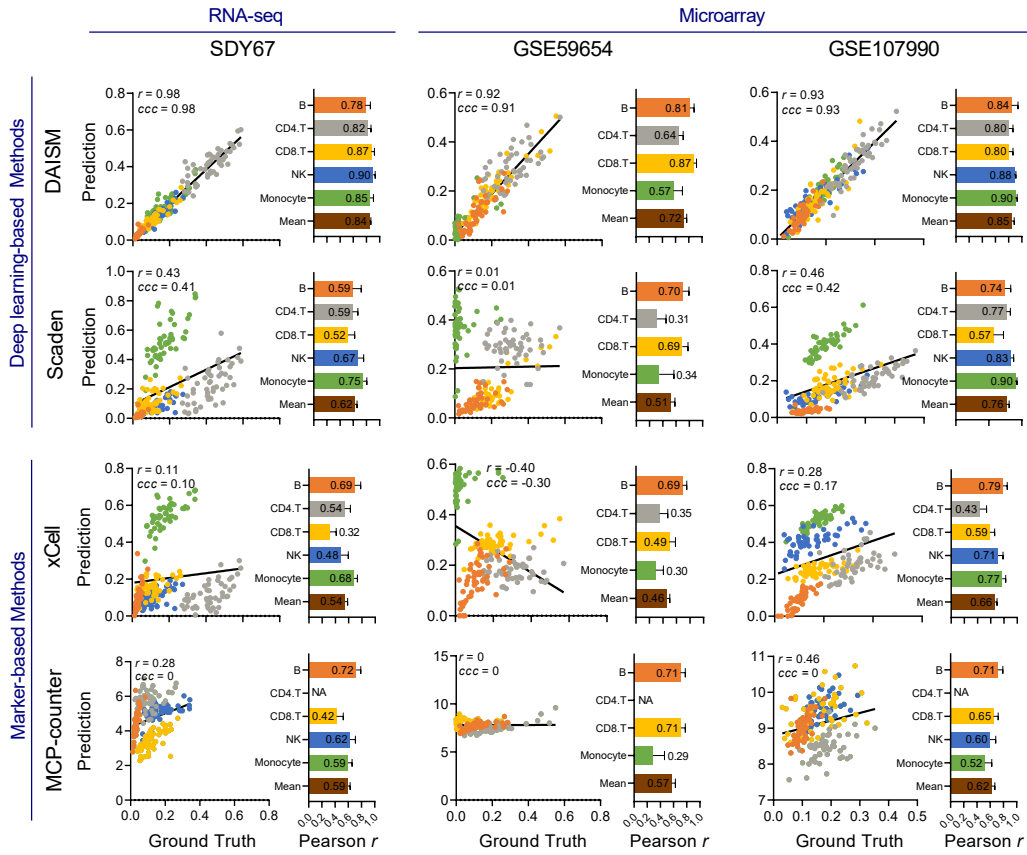

Figure S4: Performance evaluation of DAISM-DNN and other deep learning-based and marker-based deconvolution methods, tested on one RNA-seq dataset SDY67 (left) and two microarray datasets GSE59654 (middle) and GSE107990 (right). In each subplot, the scatter plot shows a global Pearson correlation ( $r$ ) and concordance correlation coefficient (CCC). The bar plot displays per-cell-type Pearson correlation. The value in bar plots indicates the mean value over 30 experiments. Since different methods provide fraction of different cell types, we only validated the ones detected from flow cytometry in each dataset. NAs in the bar plots indicate cell types that cannot be predicted by this method.

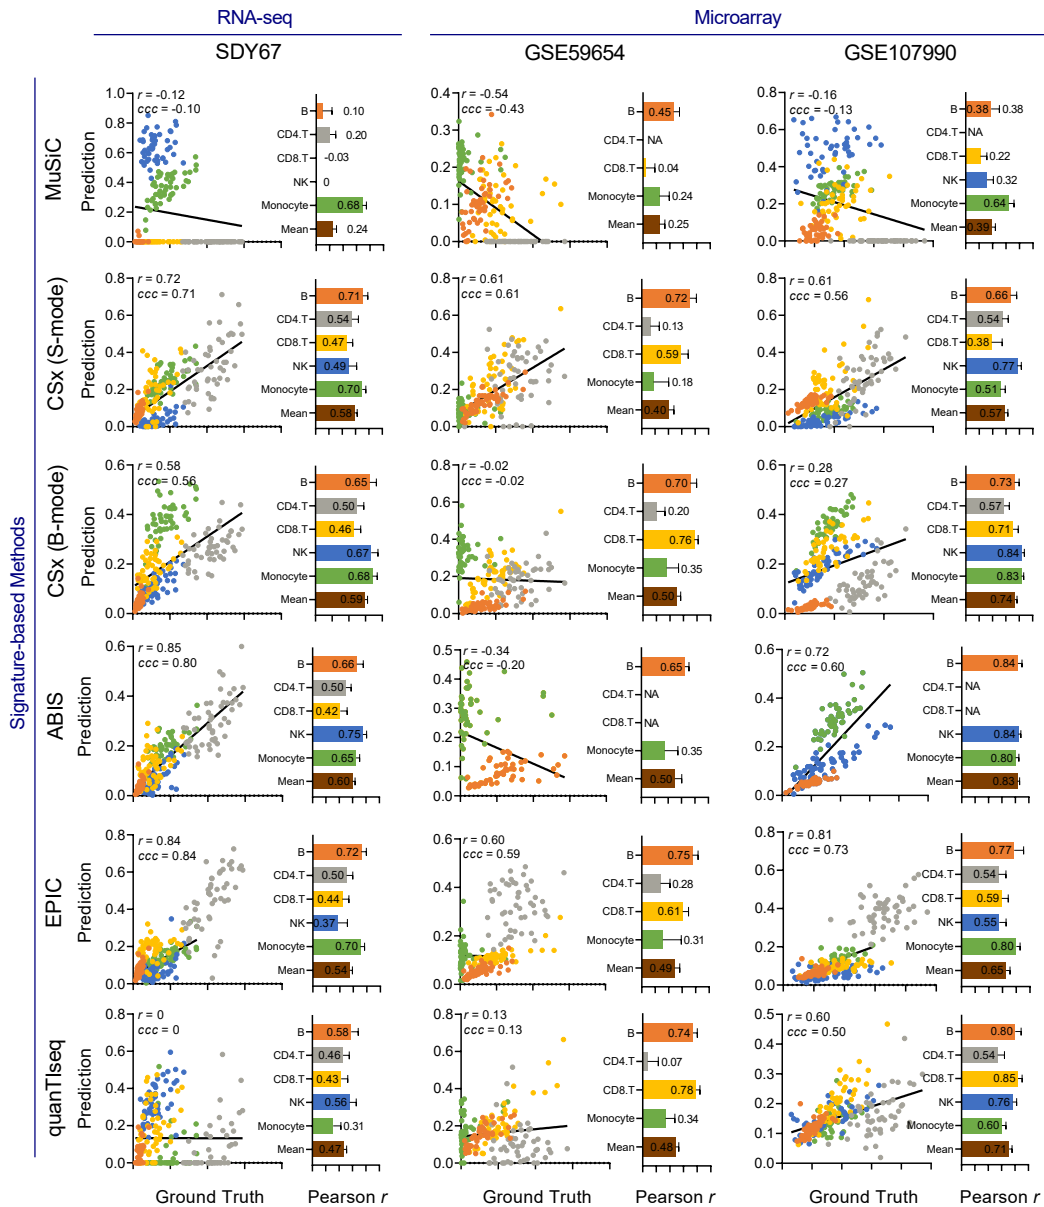

Figure S5: Performance evaluation of signature-based deconvolution methods, tested on one RNA-seq dataset SDY67 (left) and two microarray datasets GSE59654 (middle) and GSE107990 (right). In each subplot, the scatter plot shows a global Pearson correlation ( $r$ ) and concordance correlation coefficient (CCC). The bar plot displays per-cell-type Pearson correlation. The value in bar plots indicates the mean value over 30 experiments. Since different methods provide fraction of different cell types, we only validated the ones detected from flow cytometry in each dataset. NAs in the bar plots indicate cell types that cannot be predicted by this method.

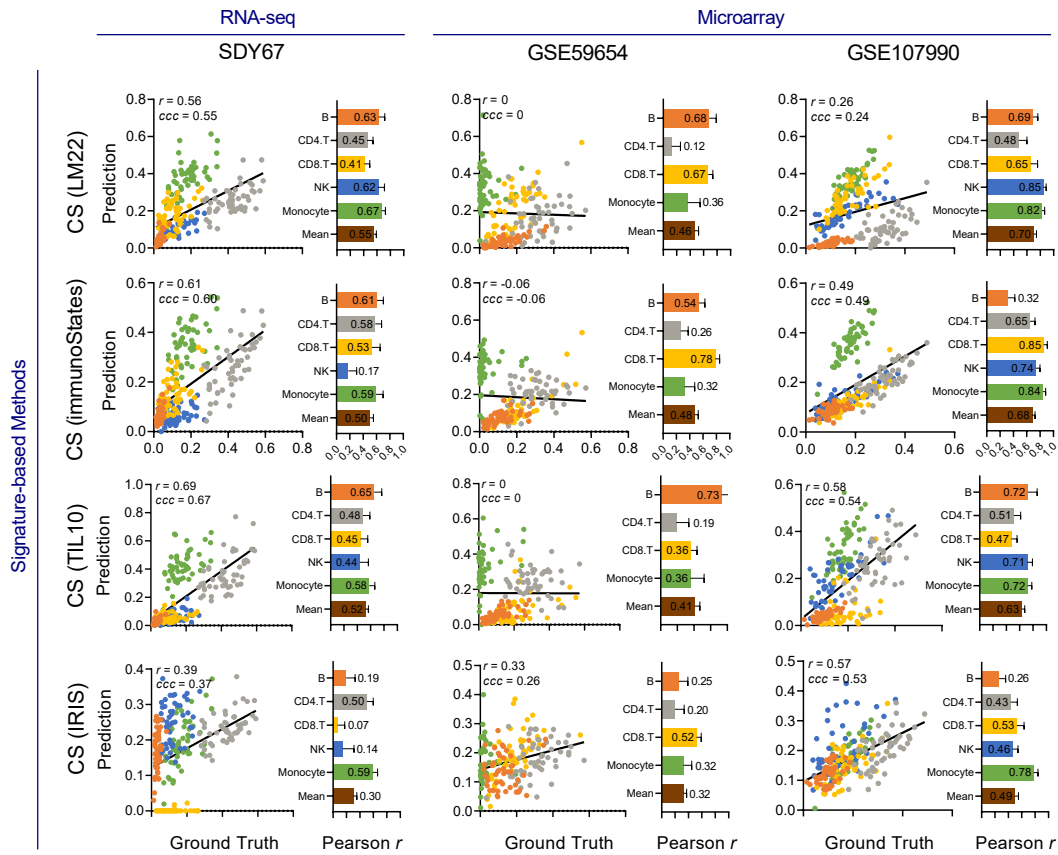

Figure S6: Performance evaluation CIBERSORT with different signature matrices, tested on one RNA-seq dataset SDY67 (left) and two microarray datasets GSE59654 (middle) and GSE107990 (right). In each subplot, the scatter plot shows a global Pearson correlation ( $r$ ) and concordance correlation coefficient (CCC). The bar plot displays per-cell-type Pearson correlation. The value in bar plots indicates the mean value over 30 experiments. Since different methods provide fraction of different cell types, we only validated the ones detected from flow cytometry in each dataset. NAs in the bar plots indicate cell types that cannot be predicted by this method.

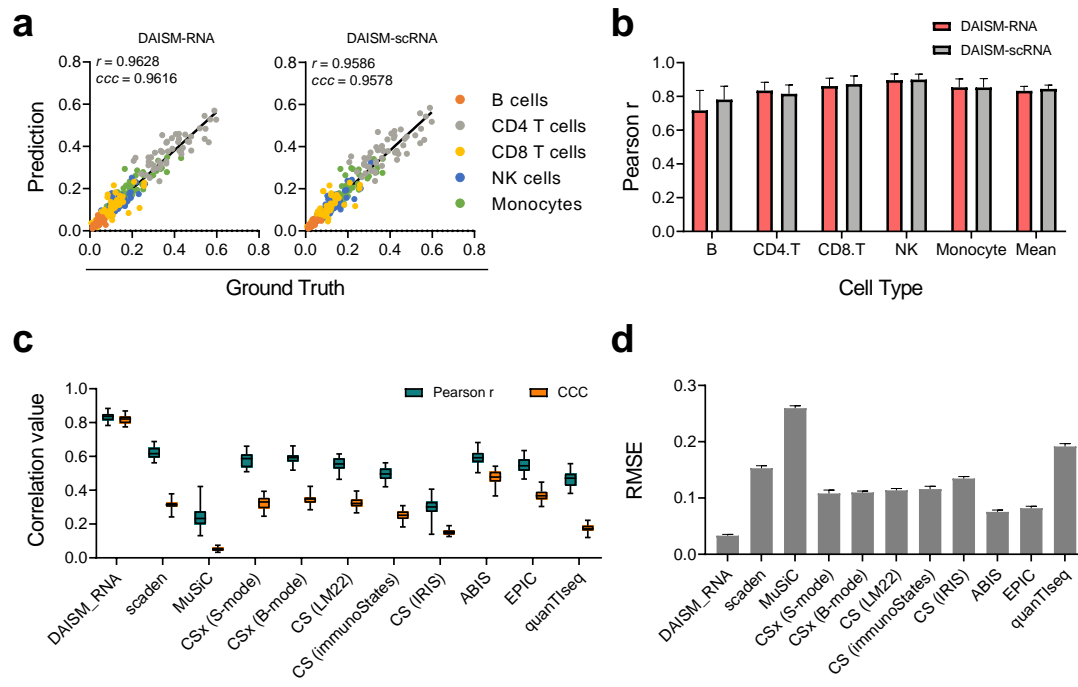

Figure S7: Performance evaluation of DAISM-RNA mode on RNA-seq dataset SDY67. (a-b) Deconvolution performance comparison between DAISM-RNA and DAISM-scRNA mode. Global Pearson correlation ( $r$ ) and CCC are shown in scatter plots (a), and per-cell-type Pearson correlation are shown in the bar plot (b). (c-d) Comparison of DAISM-RNA mode with other methods by mean of per-cell type Pearson correlation and CCC (c) and RMSE (d). All data in bar plots are presented as the mean $\pm$ SD.

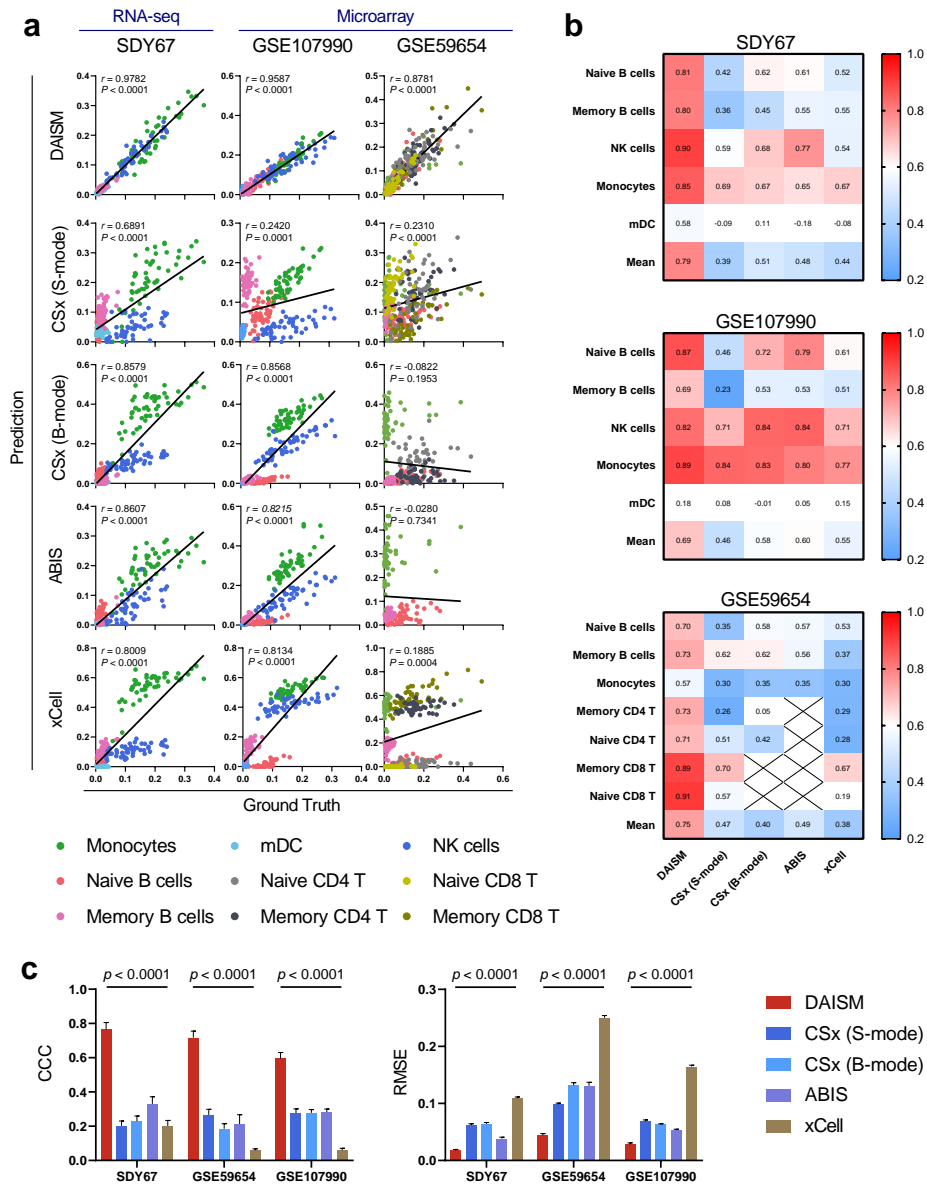

Figure S8: Performance of DAISM-DNN in fine-grained mode and benchmarking with four methods, validated using one RNA-seq dataset SDY67 and two microarray datasets GSE107990 and GSE59654. (a) Global Pearson correlation ( $r$ ) between predicted and ground truth cell fraction. SDY67 and GSE107990 have five cell types: naive/memory B cells, NK cells, monocytes, myeloid dendritic cells (mDC), and GSE59654 has seven cell types: naive/memory B cells, monocytes, naive/memory CD4/CD8 T cells. (b) Heatmap summarizing performance of all methods after 30 permutation experiments by mean of Pearson  $p$  correlation on each cell type and the mean of per-cell-type Pearson correlation (the last row in each heatmap). (c) Barplots of RMSE (right) and CCC (left) for five methods. Data are presented as means $\pm$ SD. Two-sided paired Student's  $t$  tests were used to compare DAISM-DNN with other methods.

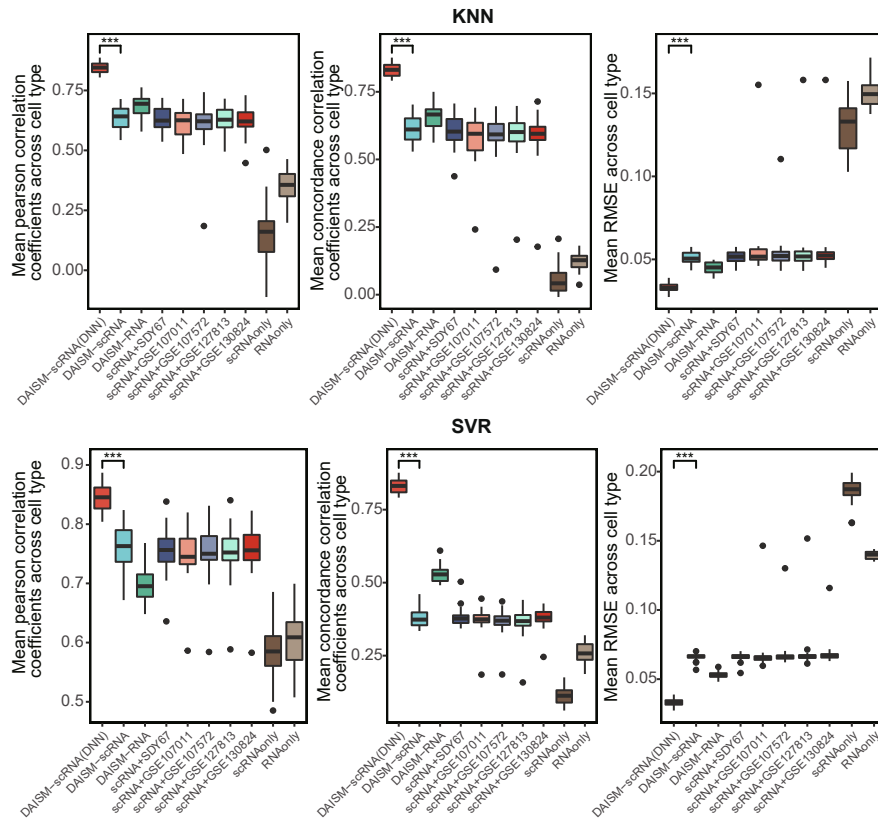

Figure S9: Performance of two machine learning models (KNN and SVR) on different training datasets generated by different mixing strategies. The first boxplot in each plotting demonstrates the performance of DNN trained by DAISM-generated training sets (paired two-sided Student's *t*-test).

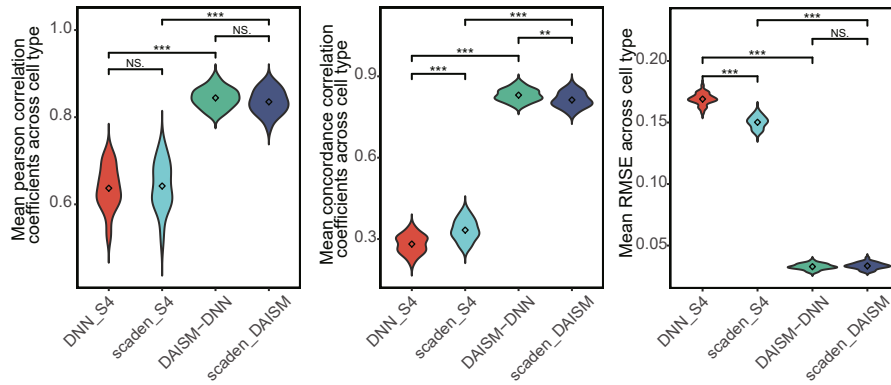

Figure S10: Evaluation of prediction accuracy of DAISM-DNN and Scaden using the same training sets. The performance of each model was measured from 30 permutation tests. In each permutation test, 50 samples of SDY67 dataset were randomly selected as test data, and the remaining samples were used as calibration data. Two training sets generated by different mixing strategies were used to train DAISM-DNN and Scaden. One is DAISM-generated training dataset. The other is the combination of four pre-generated PBMC *in silico* mixtures provided in Scaden paper (S4).



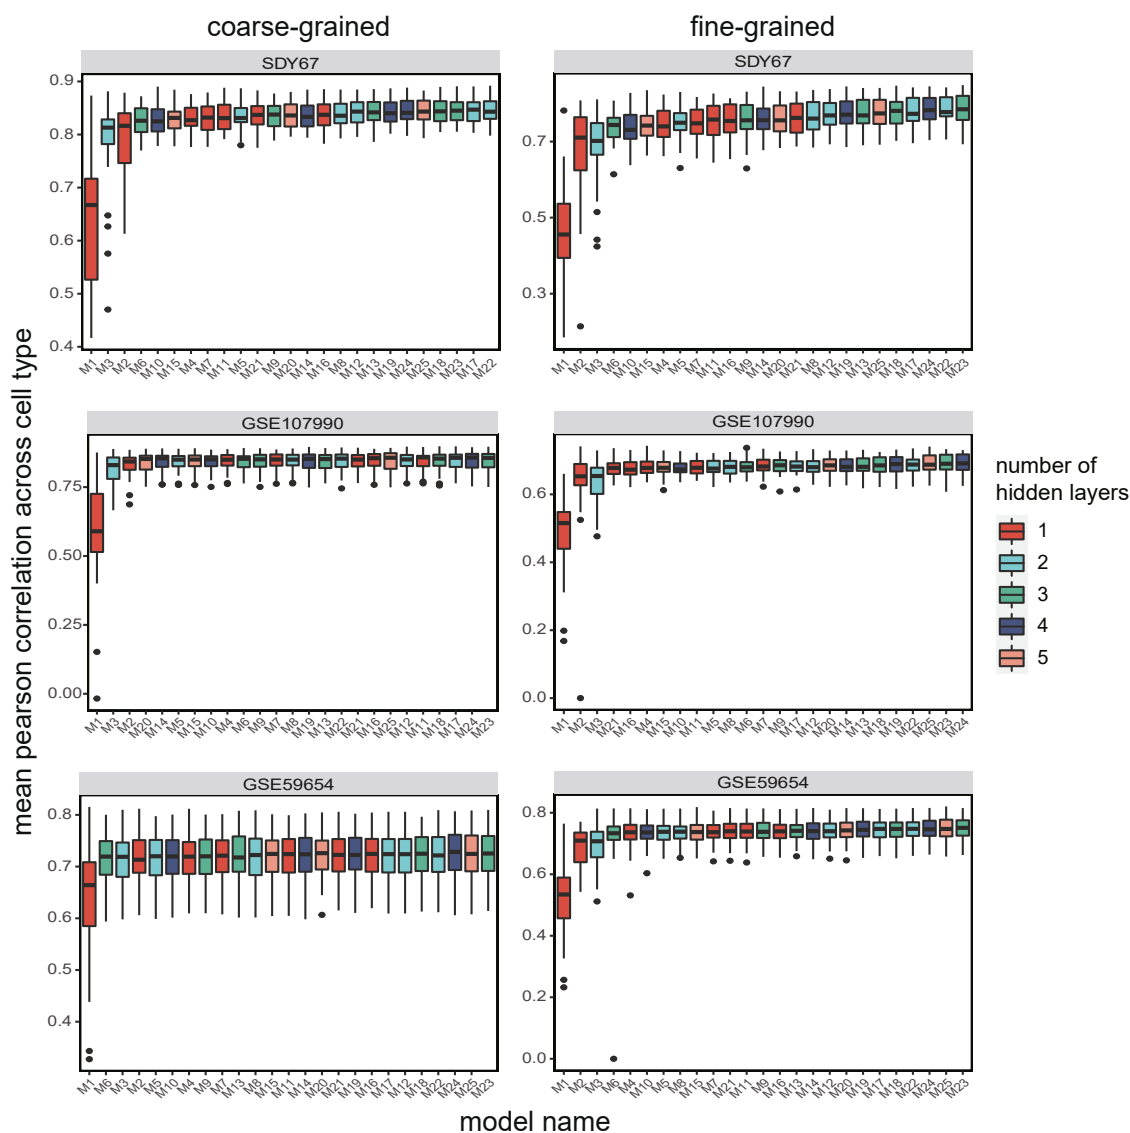

Figure S11: Performance of DAISM-DNN with deep neural networks of different hidden layers and number of neurons. The detailed architectures of each model were listed in Table S3. ReLU activation was used for all hidden layers. We considered 25 combinations of different numbers of neurons for the layers in the neural network. We tested DAISM-DNN with different hyperparameters on three PBMC datasets (SDY67, GSE107990 and GSE59654). For each hyperparameter setting, the model was built and trained on the same training set (16,000 samples). The performance of each model was measured from 30 permutation tests. In each permutation test, 50 randomly selected samples were held out as the test samples and the remaining samples from the same dataset were used as calibration samples.

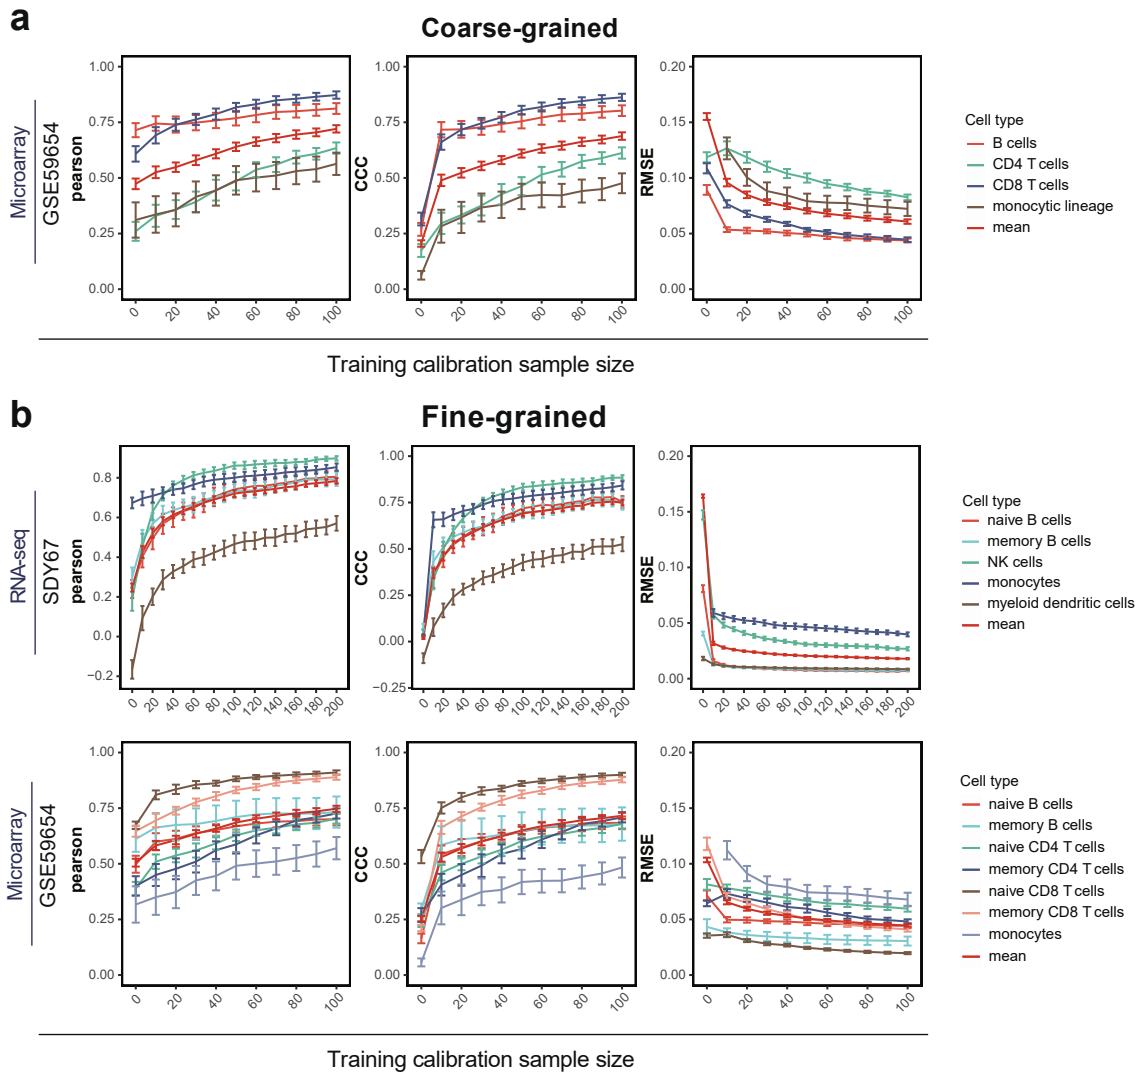

Figure S12: The effect of calibration sample size on the DAISM-DNN pipeline, assessed by the Pearson correlation, CCC and RMSE of the cell type proportion estimation results. (a) Results for microarray dataset GSE59654 for coarse-grained cell types deconvolution. Data are presented as means  $\pm$  SEM, coloured by different cell types in each dataset. (b) Results for RNA-seq dataset SDY67 and microarray dataset GSE59654 for fine-grained cell types deconvolution.

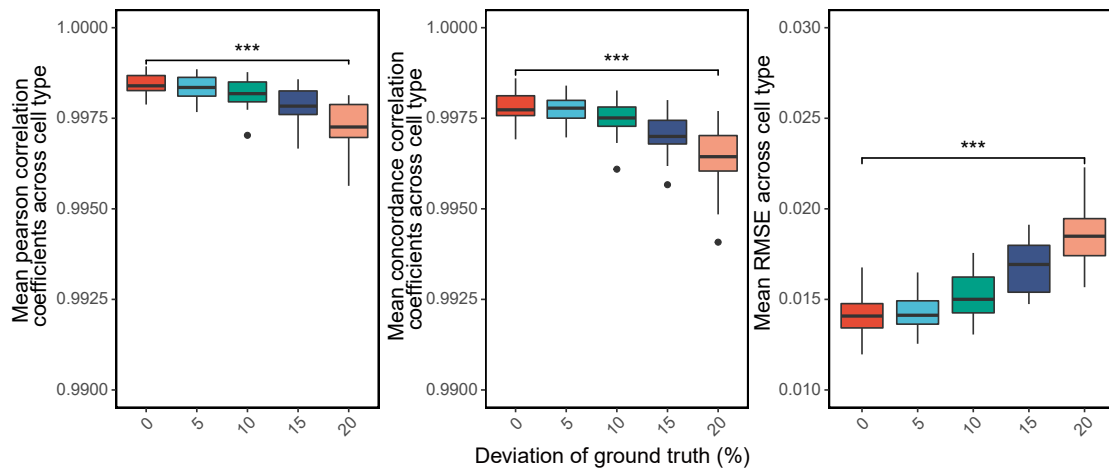

Figure S13: The performance of DAISM-DNN when ground truth of calibration samples ( $n = 200$ ) has different degrees of deviation (5, 10, 15, 20%).\*\*\* $P < 0.001$ , paired one-way ANOVA test.

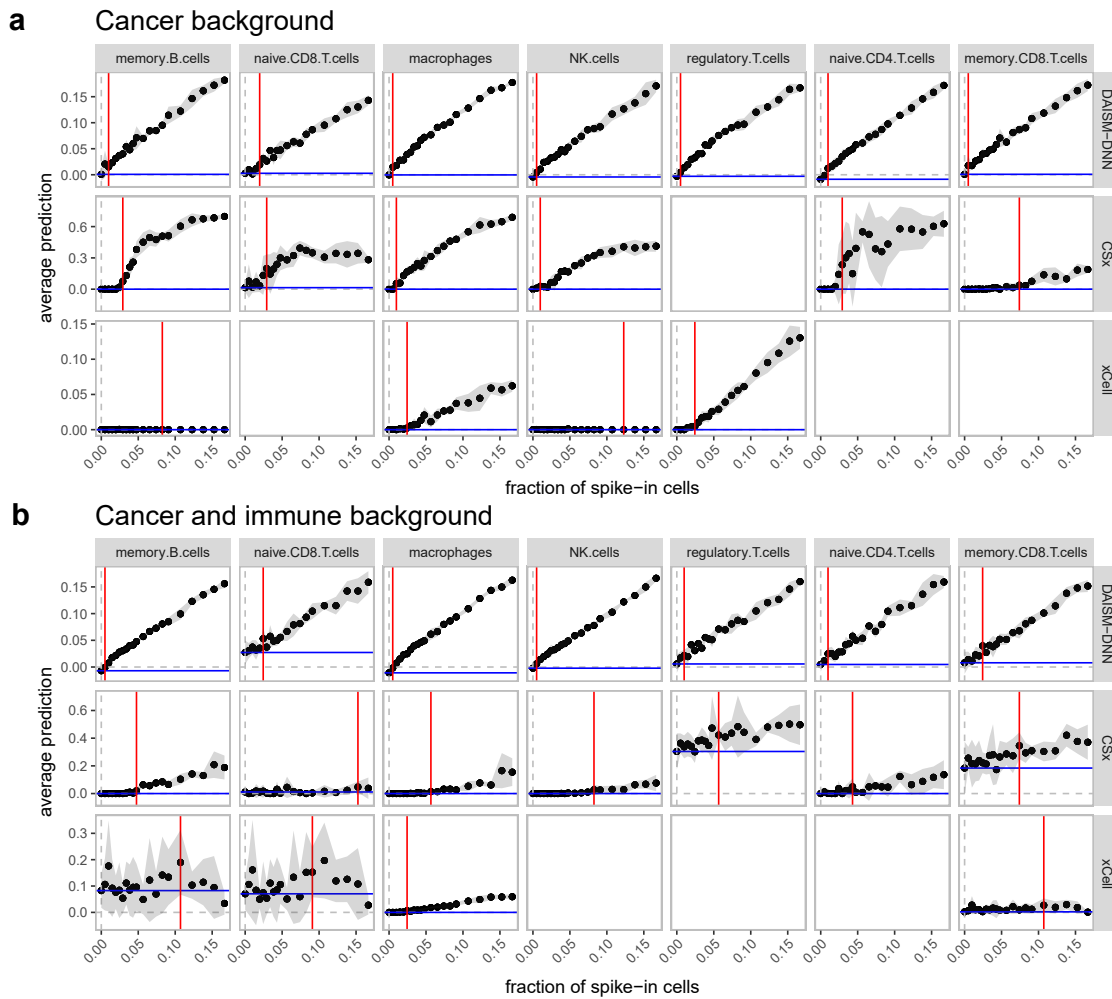

Figure S14: Minimal detection fraction of DAISM-DNN compared with CIBERSORTx and xCell. For each panel, we created simulated bulk RNA-seq samples by spiking-in an increasing amount of the cell type of interest and a background of 1000 cells randomly sampled from the other cell types. The dots show the mean predicted score across five independently simulated samples for each fraction of spike-in cells. The grey ribbon indicates the 95% confidence interval. The red line refers to the minimal detection fraction, i.e., the minimal fraction of an immune cell type needed for a method to reliably detect its abundance as significantly different from the background ( $P$ -value  $< 0.05$ , one-sided Student's  $t$ -test). The blue line refers to the background prediction level, i.e., the average estimate of a method while the cell type of interest is absent. (a) A background of 1000 cells randomly sampled from cancer cells. (b) A background of 1000 cells randomly sampled from cancer and all other immune cells.

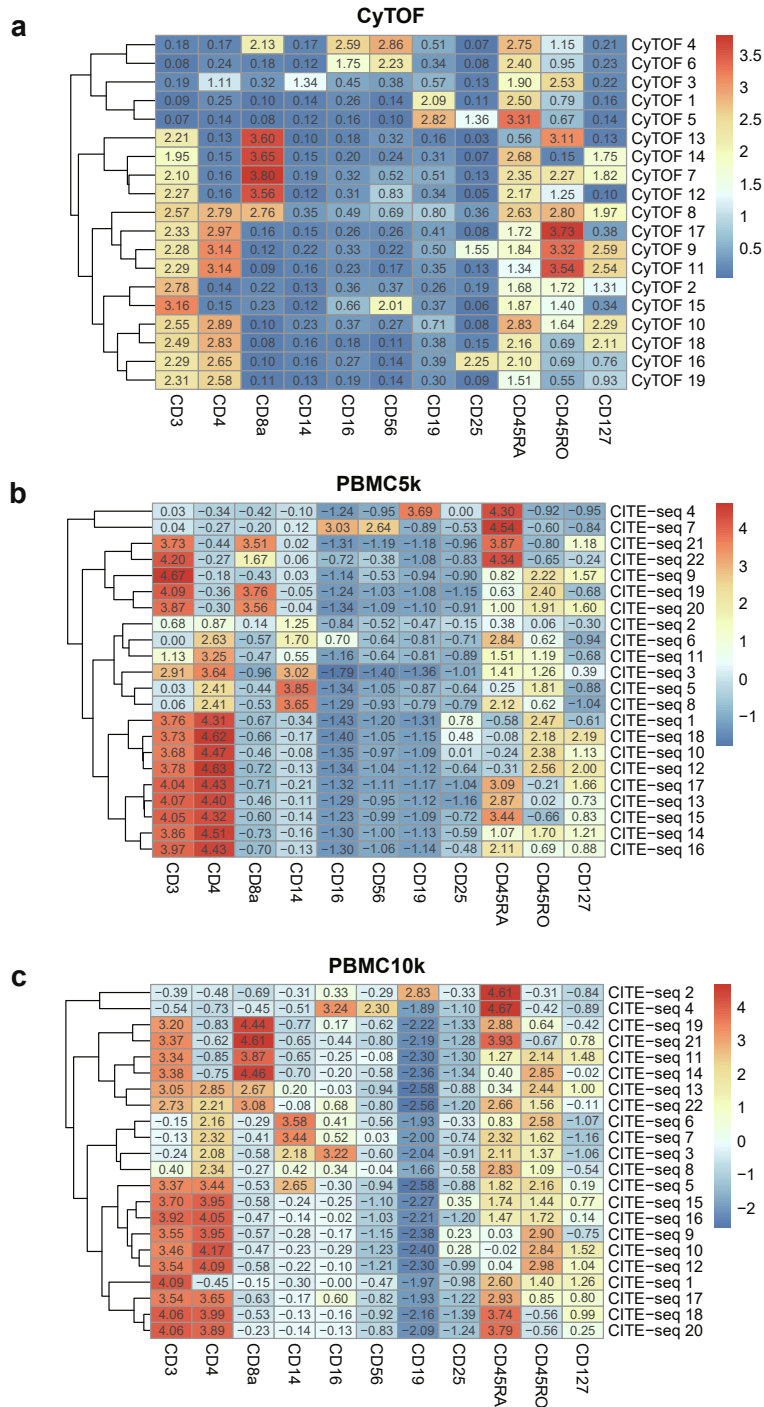

Figure S15: Heatmap showing mean values of normalized markers expression in each Phenograph clusters. CyTOF in-house dataset (a) and two public CITE-seq datasets (b) PBMC5k and (c) PBMC10k.

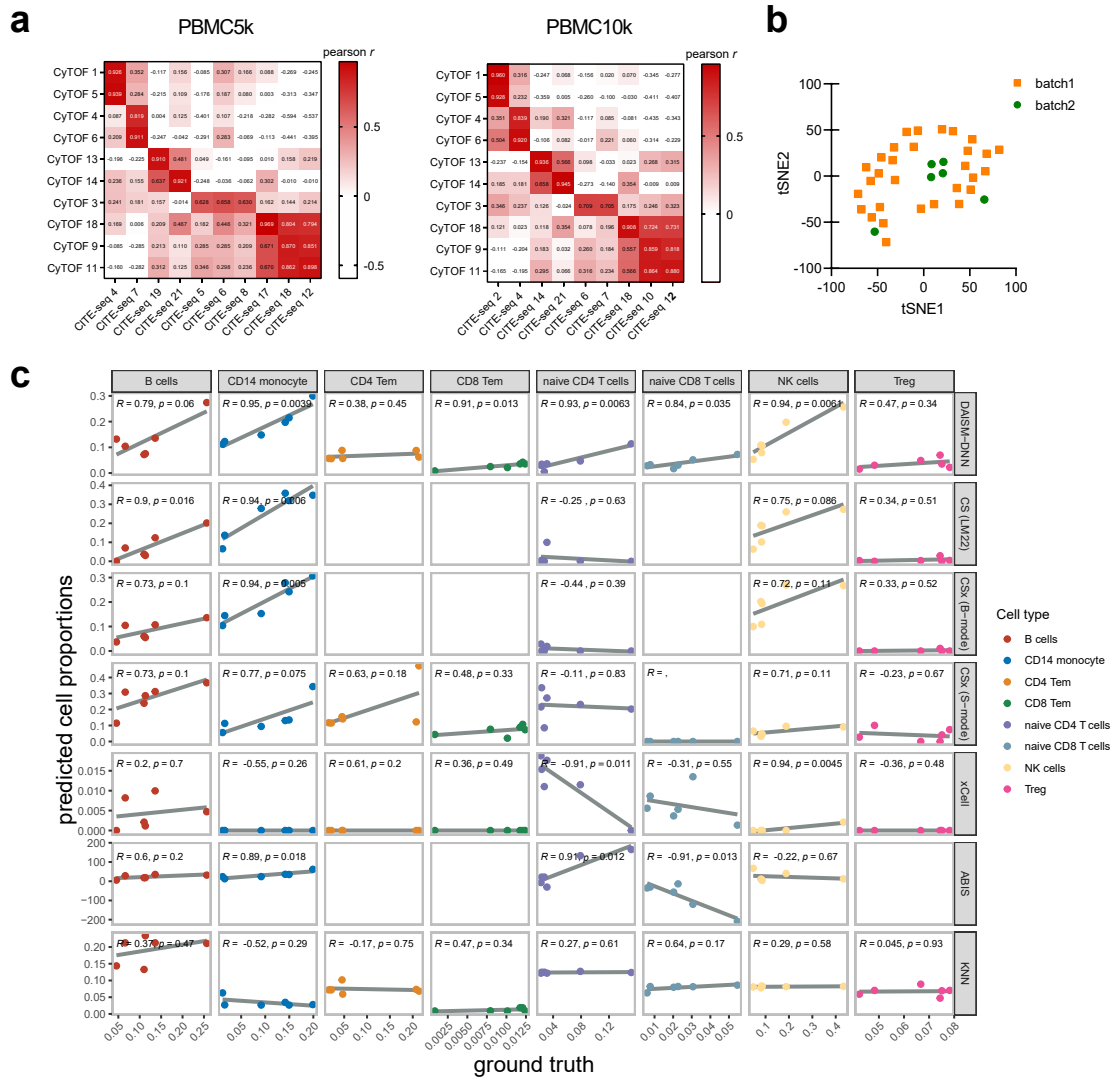

Figure S16: DAISM-DNN enables cross-batch accurate cell type proportion estimation. (a) Heatmap showing Pearson correlation between CyTOF data clusters and CITE-seq data clusters used for augmentation. (b) The t-SNE projection of in-house dataset colored in different batches. (c) Scatterplots for eight immune cell types of ground truth (x axis) and predicted values (y axis) for DAISM-DNN, CSx (including two batch-correction modes), xCell, ABIS and KNN on in-house data. Numbers inside the plotting area signify Pearson correlation values and p-values (Student's *t*-test).

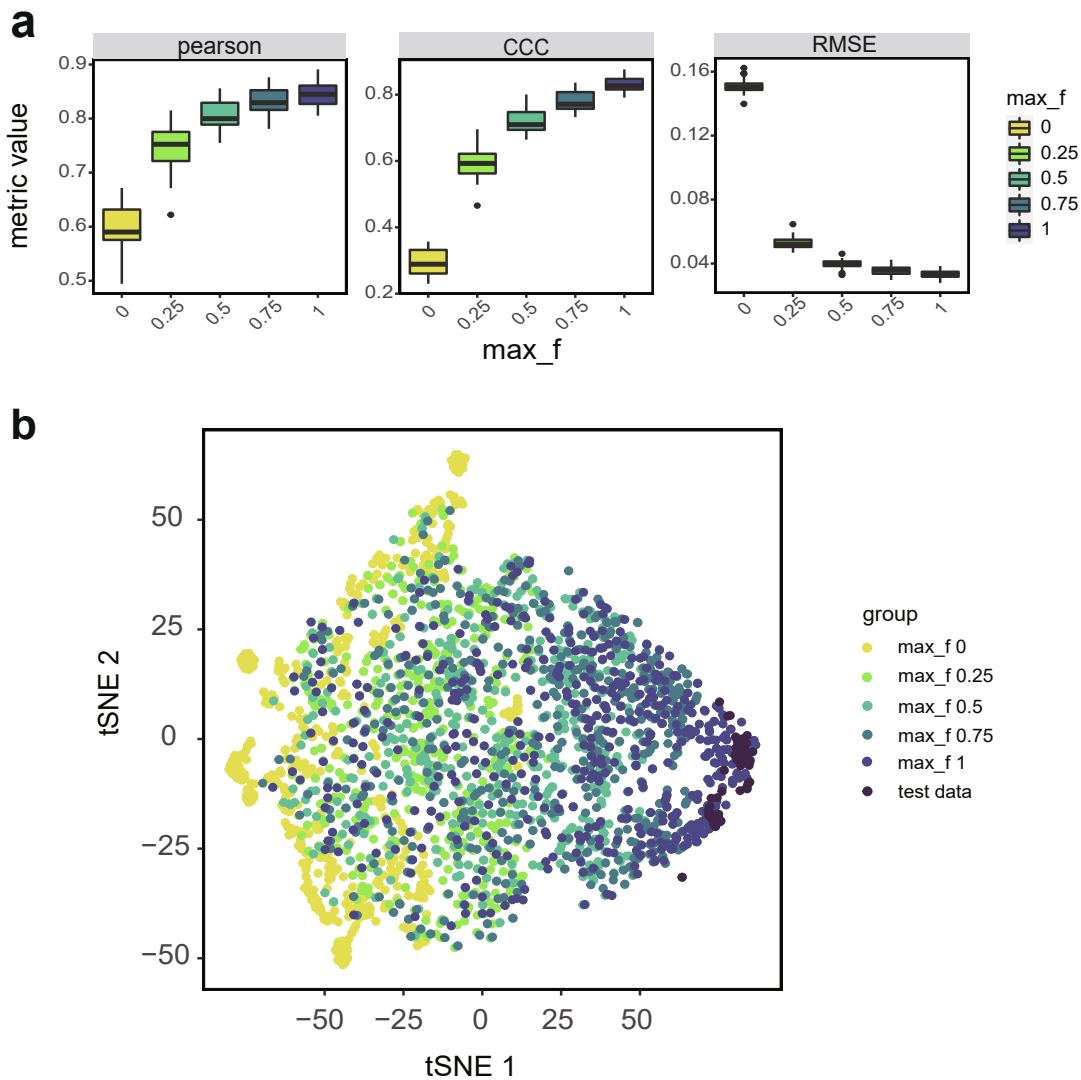

Figure S17: Assessment of the effect of max fraction of calibration samples on DAISM-DNN. (a) Performance of DAISM-DNN on different levels of max fraction of calibration samples when creating *in silico* mixing samples. The fraction of calibration samples was a random variable with uniform distribution between 0 and max\_f. We performed 30 permutation experiments. In each permutation tests, 50 randomly selected samples of SDY67 dataset were used as testing and the remaining samples were used as calibration samples for creating DAISM-generated training set. (b) The t-SNE projection of the SDY67 dataset (n = 50 samples) and training datasets (n = 500 samples per set) constructed by DAISM mixing strategies, coloured according to different max fraction of calibration samples in mixed samples.

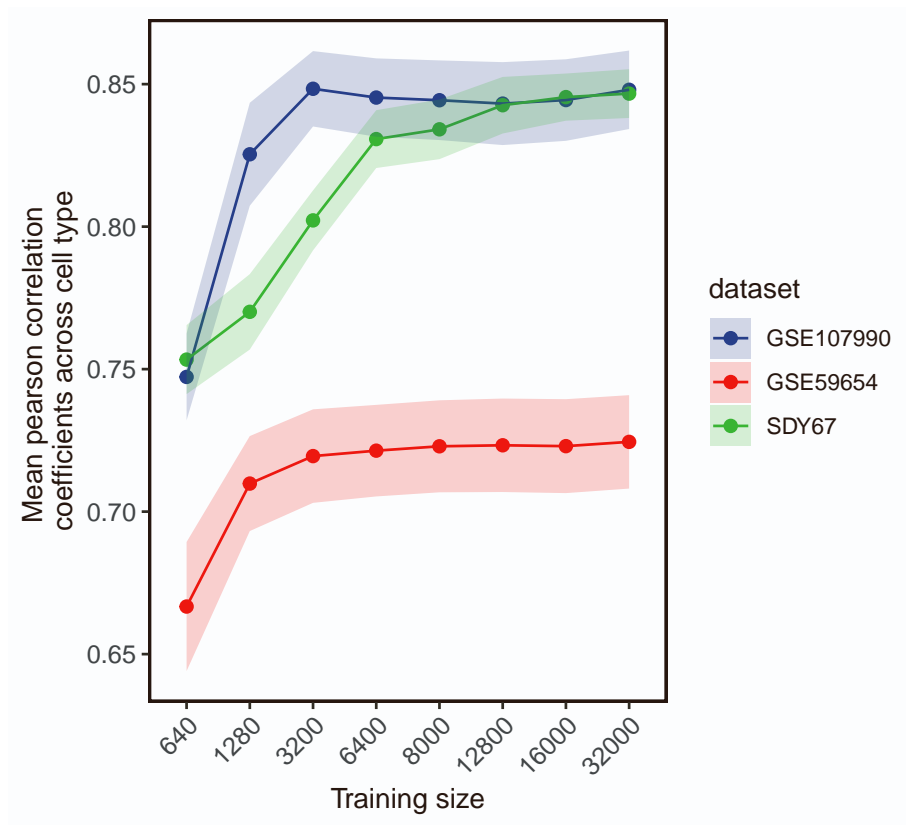

Figure S18: Assessment of the effect of training data size on mean Pearson correlation coefficients across cell types. We used the pbmc8k single cell dataset as augmentation dataset to generate training data of different sizes between 640 samples and 32,000 samples for training the DNN. For each real world dataset, 50 samples were randomly selected for testing and the remaining samples of the corresponding dataset were used as calibration samples to perform DAISM mixing strategy to generate training dataset. The ribbon indicates the 95% confidence interval.



# Supplementary Tables

**Table S1:** Overview of related methods for immune cells abundance prediction.

| Methods          | Type            | Comparisons  | Data Algorithm                                                      | Model Algorithm                                | Reference              |
|------------------|-----------------|--------------|---------------------------------------------------------------------|------------------------------------------------|------------------------|
| DAISM-DNN        | DNN-based       | intra, inter | data augmentation                                                   | deep learning                                  | this paper             |
| Scaden           | DNN-based       | intra, inter | bulk RNA-seq mixtures simulated with scRNA-seq data                 | deep learning                                  | Menden et al., 2019    |
| MuSiC            | signature-based | intra, inter | weighting of genes showing cross-subject and cross-cell consistency | weighted non-negative least squares regression | Wang et al., 2019      |
| CIBERSORTx (CSx) | signature-based | intra, inter |                                                                     | v-support vector regression                    | Newman et al., 2019    |
| CIBERSORT (CS)   | signature-based | inter        |                                                                     | v-support vector regression                    | Newman et al., 2015    |
| ABIS             | signature-based | intra, inter | TMM normalization, mRNA scaling factor                              | robust linear modeling                         | Monaco et al., 2019    |
| EPIC             | signature-based | intra, inter | renormalization based on cell-type-specific mRNA content            | constrained least square regression            | Racle et al., 2017     |
| quanTIseq        | signature-based | intra, inter |                                                                     | constrained least square regression            | Finotello et al., 2017 |
| MCP-counter      | marker-based    | inter        | transcriptomic markers selection                                    | geometric mean of expression of marker genes   | Becht et al., 2016     |
| xCell            | marker-based    | inter        | spillover compensation                                              | ssGSEA                                         | Aran et al., 2017      |

**Table S2:** Inventory of expression datasets analyzed in this work.

| Name      | Species | Accession number or URL                                                                             | Tissues                                | No. total samples/cells | No. analyzed samples/cells | Data type  | Platform                                     | Reference         |
|-----------|---------|-----------------------------------------------------------------------------------------------------|----------------------------------------|-------------------------|----------------------------|------------|----------------------------------------------|-------------------|
| GSE64385  | Human   | GEO:<br>GSE64385                                                                                    | PBMC and Polymorphonuclear Cells (PMN) | 12                      | 10                         | Microarray | Affymetrix Human Genome U133 Plus 2.0 Array  | Becht et al.      |
| GSE65133  | Human   | GEO:<br>GSE65133                                                                                    | PBMC                                   | 20                      | 20                         | Microarray | Illumina HumanHT-12 V4.0 expression beadchip | Newman et al.     |
| GSE106898 | Human   | GEO:<br>GSE106898                                                                                   | PBMC                                   | 12                      | 12                         | Microarray | Illumina HumanHT-12 V4.0 expression beadchip | Monaco et al.     |
| GSE64655  | Human   | GEO:<br>GSE64655                                                                                    | PBMC                                   | 8                       | 8                          | RNA-seq    | Illumina HiSeq 2000 (Homo sapiens)           | Hoek et al.       |
| GSE127813 | Human   | GEO:<br>GSE127813                                                                                   | whole blood                            | 12                      | 12                         | RNA-seq    | Illumina HiSeq 4000 (Homo sapiens)           | Newman et al.     |
| GSE107011 | Human   | GEO:<br>GSE107011                                                                                   | PBMC                                   | 12                      | 12                         | RNA-seq    | Illumina HiSeq 2000 (Homo sapiens)           | Monaco et al.     |
| GSE59654  | Human   | GEO:<br>GSE59654                                                                                    | PBMC                                   | 156                     | 153                        | Microarray | Illumina HumanHT-12 V4.0 expression beadchip | Thakar et al.     |
| GSE107990 | Human   | GEO:<br>GSE107990                                                                                   | PBMC                                   | 671                     | 164                        | Microarray | Illumina HumanHT-12 V4.0 expression beadchip | Narang et al.     |
| SDY67     | Human   | <a href="https://www.immport.org/shared/study/SDY67">https://www.immport.org/shared/study/SDY67</a> | PBMC                                   | 477                     | 250                        | RNA-seq    | Illumina HiSeq 2000 (Homo sapiens)           | Zimmermann et al. |
| GSE107572 | Human   | GEO:<br>GSE107572                                                                                   | PBMC/PMN cell mixture                  | 9                       | 9                          | RNA-seq    | Illumina HiSeq 2500 (Homo sapiens)           | Finotello et al.  |
| GSE130824 | Human   | GEO:<br>GSE130824                                                                                   | whole blood                            | 35                      | 35                         | RNA-seq    | Illumina HiSeq 2500 (Homo sapiens)           | Mao et al.        |

|           |       |                                                                                                                                                                                                             |       |      |      |           |                                     |              |
|-----------|-------|-------------------------------------------------------------------------------------------------------------------------------------------------------------------------------------------------------------|-------|------|------|-----------|-------------------------------------|--------------|
| PBMC8k    | Human | <a href="https://support.10xgenomics.com/single-cell-gene-expression/datasets/2.1.0/pbmc8k">https://support.10xgenomics.com/single-cell-gene-expression/datasets/2.1.0/pbmc8k</a>                           | PBMCs | 8381 | 8038 | scRNA-seq | 10x Chromium v2 (3' kit)            | 10x Genomics |
| PBMC6k    | Human | <a href="https://support.10xgenomics.com/single-cell-gene-expression/datasets/1.1.0/pbmc6k">https://support.10xgenomics.com/single-cell-gene-expression/datasets/1.1.0/pbmc6k</a>                           | PBMCs | 5419 | 4745 | scRNA-seq | 10x Chromium v1                     | 10x Genomics |
| GSE115978 | Human | <a href="https://www.ncbi.nlm.nih.gov/geo/query/acc.cgi?acc=GSE115978">https://www.ncbi.nlm.nih.gov/geo/query/acc.cgi?acc=GSE115978</a>                                                                     | PBMCs | 7186 | 7186 | scRNA-seq | Illumina NextSeq 500 (Homo sapiens) | Arnon et al. |
| PBMC10k   | Human | <a href="https://support.10xgenomics.com/single-cell-gene-expression/datasets/3.0.0/pbmc_10k_protein_v3">https://support.10xgenomics.com/single-cell-gene-expression/datasets/3.0.0/pbmc_10k_protein_v3</a> | PBMCs | 7865 | 6630 | CITE-seq  | Illumina NovaSeq                    | 10x Genomics |
| PBMC5K    | Human | <a href="https://support.10xgenomics.com/single-cell-gene-expression/datasets/3.0.2/5k_pbmc_protein_v3">https://support.10xgenomics.com/single-cell-gene-expression/datasets/3.0.2/5k_pbmc_protein_v3</a>   | PBMCs | 5247 | 3902 | CITE-seq  | Illumina NovaSeq                    | 10x Genomics |

**Table S3:** Hyperparameter settings of different numbers of neurons and layers of DAISM-DNN.

| Model | N neurons layer1 | N neurons layer2 | N neurons layer3 | N neurons layer4 | N neurons layer5 |
|-------|------------------|------------------|------------------|------------------|------------------|
| M1    | 16               |                  |                  |                  |                  |
| M2    | 32               |                  |                  |                  |                  |
| M3    | 32               | 16               |                  |                  |                  |
| M4    | 64               |                  |                  |                  |                  |
| M5    | 64               | 32               |                  |                  |                  |
| M6    | 64               | 32               | 16               |                  |                  |
| M7    | 128              |                  |                  |                  |                  |
| M8    | 128              | 64               |                  |                  |                  |
| M9    | 128              | 64               | 32               |                  |                  |
| M10   | 128              | 64               | 32               | 16               |                  |
| M11   | 256              |                  |                  |                  |                  |
| M12   | 256              | 128              |                  |                  |                  |
| M13   | 256              | 128              | 64               |                  |                  |
| M14   | 256              | 128              | 64               | 32               |                  |
| M15   | 256              | 128              | 64               | 32               | 16               |
| M16   | 512              |                  |                  |                  |                  |
| M17   | 512              | 256              |                  |                  |                  |
| M18   | 512              | 256              | 128              |                  |                  |
| M19   | 512              | 256              | 128              | 64               |                  |
| M20   | 512              | 256              | 128              | 64               | 32               |
| M21   | 1024             |                  |                  |                  |                  |
| M22   | 1024             | 512              |                  |                  |                  |
| M23   | 1024             | 512              | 256              |                  |                  |
| M24   | 1024             | 512              | 256              | 128              |                  |
| M25   | 1024             | 512              | 256              | 128              | 64               |

**Table S5:** List of Antibodies.

| List | Label | Antibody Target | clone     | Category |
|------|-------|-----------------|-----------|----------|
| 1    | 89Y   | CD45            | HI30      | Surface  |
| 2    | 115In | CD3             | UCHT1     | Surface  |
| 3    | 141Pr | CD56            | NCAM16.2  | Surface  |
| 4    | 142Nd | CD123           | 6H6       | Surface  |
| 5    | 143Nd | CD274/PDL1      | 29E.2A3   | Surface  |
| 6    | 144Nd | CD14            | M5E2      | Surface  |
| 7    | 145Nd | CD27            | O323      | Surface  |
| 8    | 146Nd | CD11a           | HI111     | Surface  |
| 9    | 147Sm | CD197/CCR7      | G043H7    | Surface  |
| 10   | 148Nd | CD19            | HIB19     | Surface  |
| 11   | 149Sm | CD33            | WM53      | Surface  |
| 12   | 150Nd | CD223/LAG3      | 874501    | Surface  |
| 13   | 151Eu | CD45RO          | UCHL1     | Surface  |
| 14   | 152Sm | CD195/CCR5      | J418F1    | Surface  |
| 15   | 153Eu | CD366/Tim_3     | F38-2E2   | Surface  |
| 16   | 154Sm | Tbet            | 4B10      | intra    |
| 17   | 155Gd | CD45RA          | HI100     | Surface  |
| 18   | 156Gd | CD194/CCR4      | L291H4    | Surface  |
| 19   | 157Gd | CD206           | 44242     | Surface  |
| 20   | 158Gd | CD127           | A019D5    | Surface  |
| 21   | 159Tb | CD11c           | BU15      | Surface  |
| 22   | 160Gd | CD25            | 24212     | Surface  |
| 23   | 161Dy | CD152/CTLA4     | 14D3      | Surface  |
| 24   | 162Dy | Foxp3           | PCH101    | intra    |
| 25   | 163Dy | CD163           | GHI/61    | Surface  |
| 26   | 164Dy | CD38            | HIT2      | Surface  |
| 27   | 165Ho | CD44            | BJ18      | Surface  |
| 28   | 166Er | CD69            | FN50      | Surface  |
| 29   | 167Er | CD36            | 5-271     | Surface  |
| 30   | 168Er | CD137/4-1BB     | 4B4-1     | Surface  |
| 31   | 169Tm | Ki67            | SolA15    | intra    |
| 32   | 170Er | CD7             | CD7-6B7   | Surface  |
| 33   | 171Yb | CD279/PD1       | EH12.2H7  | Surface  |
| 34   | 172Yb | CD273/PDL2      | 24F.10C12 | Surface  |

|    |       |            |           |         |
|----|-------|------------|-----------|---------|
| 35 | 173Yb | CD278/ICOS | C398.4A   | Surface |
| 36 | 174Yb | CD134/OX40 | BER-ACT35 | Surface |
| 37 | 175Lu | CD16       | 3G8       | Surface |
| 38 | 176Yb | HLA-DR     | L243      | Surface |
| 39 | 197Au | CD4        | RPA-T4    | Surface |
| 40 | 198Pt | CD8a       | RPA-T8    | Surface |
| 41 | 209Bi | CD11b      | M1/70     | Surface |
